# Supplementary material for: A to Z of polymorphs related by proton transfer
Source: Royal Society of Chemistry journal article supplement (doi:10.1039/d3ce00216k), 2023-01-01
Supplement: d3ce00216k1.xlsx [file d3ce00216k1.xlsx]

## Sheet: Summary
Refcodes	Other Components		Family Present in Dataset:			Polymorphic Compositions related by proton transfer - Category
	Multicomponent (non-water)	Hydrate	CSD	Drug Subset	Single Component Drug Subset
BEWKUJ13	No	No	Yes	Yes	Yes	Tautomeric Polymorphic Pairs
BEWKUJ14
BEWKUJ04
BEWKUJ05
BEWKUJ11
DAPDED	No	No	Yes	No	No	Tautomeric Polymorphic Pairs
DAPDIH
AVENOF	No	No	Yes	Yes	No	Tautomeric Polymorphic Pairs
AVENUL
KEZRUF	No	No	Yes	No	No	Tautomeric Polymorphic Pairs
NIKGIA
MDPIZO	No	No	Yes	No	No	Tautomeric Polymorphic Pairs
MTPIMZ
KIJBOX	No	No	Yes	Yes	Yes	Tautomeric Polymorphic Pairs
QIJZOY
HOZXUQ01	No	No	Yes	No	No	Tautomeric Polymorphic Pairs
HOZXUQ02
FUZYUU	No	No	Yes	No	No	Tautomeric Polymorphic Pairs
RIMYUH
WIBNUT	No	Yes	Yes	No	No	Tautomeric Polymorphic Pairs
YEXQUQ
EXUQET	No	No	Yes	No	No	Tautomeric Polymorphic Pairs
TIPVIZ
BURRIS	No	No	Yes	No	No	Tautomeric Polymorphic Pairs
TIVDUA
AMBNZA	No	No	Yes	No	No	Zwitterionic Polymorphic Pairs
AMBNZA02
AREZOM	No	No	Yes	No	No	Zwitterionic Polymorphic Pairs
VATHEG
BIXGIY	No	No	Yes	No	No	Zwitterionic Polymorphic Pairs
BIXGIY03
BIXGIY06
FISZUF
LIJFOC	No	No	Yes	No	No	Zwitterionic Polymorphic Pairs
LIJFOC01
DAMPEO	No	No	Yes	No	No	Zwitterionic Polymorphic Pairs
DAMPEO01
DAMPEO02
NEDMUF	No	No	Yes	No	No	Zwitterionic Polymorphic Pairs
POFWOX
CEKLUB	Yes	No	Yes	Yes	No	Zwitterionic Polymorphic Pairs
CEKNOX
CEKMEM	Yes	No	Yes	Yes	No	Zwitterionic Polymorphic Pairs
CEKPIT
DIKDEH	Yes	No	Yes	Yes	No	Zwitterionic Polymorphic Pairs
NIFKIX
PAVVEP	No	No	Yes	No	No	Zwitterionic Polymorphic Pairs
XEBSUU
UHITOV	No	No	Yes	Yes	Yes	Zwitterionic Polymorphic Pairs
UHITOV01
DIWMAY	No	No	Yes	No	No	Zwitterionic Polymorphic Pairs
DIWMAY01
SIPFEC	No	No	Yes	No	No	Zwitterionic Polymorphic Pairs
SIPFEC01
NUHCEB	No	No	Yes	No	No	Zwitterionic Polymorphic Pairs
NUHKIN
FALHEI01	No	No	Yes	No	No	Tautomeric Polymorphic Pairs
XUGHUD01
AZAZIM	No	No	Yes	No	No	Zwitterionic Polymorphic Pairs
CIKXOK
KIXLIN	Yes	Yes	Yes	No	No	Different Charge Position Polymorphic Pairs
MEVWEP
TOCSUC	Yes	No	Yes	No	No	Salt/Co-Crystal Pairs
TODCEX
HAZFAP01	Yes	No	Yes	No	No	Single/Multi Proton transfer Polymorphic Pairs
HAZFAP06
MOBZAE	Yes	No	Yes	No	No	Different Charge Position Polymorphic Pairs
MOBZAE01
MEJYIM	Yes	No	Yes	No	No	Single/Multi Proton transfer Polymorphic Pairs
UWUJUS
UWUKAZ	Yes	No	Yes	No	No	Single/Multi Proton transfer Polymorphic Pairs
UWUKAZ02
CIRTEC	Yes	Yes	Yes	No	No	Salt/Co-Crystal Pairs
CIRTEC02
CINMER02	No	No	Yes	No	No	Multi-Zwitterionic Polymorphic Pairs
CINMER04
LASZAI	Yes	No	Yes	Yes	No	Different Charge Position Polymorphic Pairs
LASZAI02
JIYHAD	Yes	No	Yes	No	No	Single/Multi Proton transfer Polymorphic Pairs
ZELDOM
WIRMOZ	No	No	Yes	No	No	Multi-Zwitterionic Polymorphic Pairs
WIRMOZ02
NAHCIT	Yes	No	No	Yes	No	Different Charge Position Polymorphic Pairs
NAHCIT01
VAMBIX	Yes	No	Yes	Yes	No	Salt/Co-Crystal Pairs
XOBCOH01
LAGTIZ	Yes	No	Yes	No	No	Salt/Co-Crystal Pairs
NEFFIQ
LUBGUM	Yes	No	Yes	No	No	Salt/Co-Crystal Pairs
SUHRAR
OZETAQ	Yes	No	Yes	No	No	Salt/Co-Crystal Pairs
OZEXOI
TODBAS	Yes	No	Yes	No	No	Salt/Co-Crystal Pairs
TODBIA
YIVHUI	Yes	No	Yes	No	No	Salt/Co-Crystal Pairs
YIVHUI01
WIRJIQ	No	No	Yes	No	No	Tautomeric Polymorphic Pairs
FAMJAE
TACETA05	No	No	Yes	No	No	Tautomeric Polymorphic Pairs
VIGBAR
DAZKAR	No	No	Yes	No	No	Tautomeric Polymorphic Pairs
SOLFEF
ZOTRIM01	Yes	No	Yes	No	No	Tautomeric Polymorphic Pairs
ZOTRIM
NUXKOI	No	No	Yes	No	No	Tautomeric Polymorphic Pairs
NUXLAV
ZEFDUM	No	No	Yes	No	No	Tautomeric Polymorphic Pairs
ZEFFAU
QOVZOS	No	No	Yes	No	No	Tautomeric Polymorphic Pairs
QOVZUY
YUYZAT	No	No	Yes	No	No	Tautomeric Polymorphic Pairs
YUYYUM
NATKUP	No	No	Yes	No	No	Tautomeric Polymorphic Pairs
JEMREZ
BIXKEA	No	No	Yes	No	No	Tautomeric Polymorphic Pairs
BIXKIE
ZIXYAJ	No	No	Yes	No	No	Tautomeric Polymorphic Pairs
ZIXYEN
DUQNOT	No	No	Yes	No	No	Tautomeric Polymorphic Pairs
DUQNIN
DUQMOS	No	No	Yes	No	No	Tautomeric Polymorphic Pairs
DUQMUY
WASKAD	No	No	Yes	No	No	Tautomeric Polymorphic Pairs
WASJEG
BOKVEC	No	No	Yes	No	No	Tautomeric Polymorphic Pairs
BOKVIG
XISYEE	No	No	Yes	No	No	Tautomeric Polymorphic Pairs
XIPHOU
ILIVEG	No	No	Yes	No	No	Tautomeric Polymorphic Pairs
ILIVAC
OBAQOZ	No	No	Yes	No	No	Tautomeric Polymorphic Pairs
CIQFAJ
HEHTUJ	No	No	Yes	No	No	Tautomeric Polymorphic Pairs
HEHVAR
CUMROR	No	No	Yes	No	No	Tautomeric Polymorphic Pairs
CUMPUV
CUMRIL	No	No	Yes	No	No	Tautomeric Polymorphic Pairs
CUMRUX
FEXZIR	No	No	Yes	No	No	Tautomeric Polymorphic Pairs
FEXZAJ
DEZQOQ	No	No	Yes	No	No	Tautomeric Polymorphic Pairs
DEZQUW
GIQYEN	No	No	Yes	No	No	Tautomeric Polymorphic Pairs
GIQYAJ
VIMPAJ05	No	No	Yes	No	No	Tautomeric Polymorphic Pairs
VIMPAJ
VIMPAJ03
ZUMXIQ02
ZUMXIQ
CIQCUB	No	No	Yes	No	No	Zwitterionic Polymorphic Pairs
EYUSIC
QIKHEX	No	No	Yes	No	No	Zwitterionic Polymorphic Pairs
SUXVOZ
ODIFOY	No	No	Yes	No	No	Tautomeric Polymorphic Pairs
ODIFIS
EVINOM03	No	No	Yes	No	No	Zwitterionic Polymorphic Pairs
EVINOM
SIDQEB	No	No	Yes	No	No	Tautomeric Polymorphic Pairs
FATBEI
EHOPAS	No	No	Yes	No	No	Zwitterionic Polymorphic Pairs
EHOPAS02
SUQWIK01	No	No	Yes	No	No	Tautomeric Polymorphic Pairs
SUQWIK
MEWFID
TIFTEJ	No	No	Yes	No	No	Zwitterionic Polymorphic Pairs
JARPEX
CAQYIE	No	No	Yes	No	No	Tautomeric Polymorphic Pairs
CAQYAW
CAQYAW01
CAQYIE01
CIMETD04	No	No	Yes	Yes	No	Tautomeric Polymorphic Pairs
CIMETD05
CIMETD
CIMETD01
DEBFAR	No	No	Yes	No	No	Tautomeric Polymorphic Pairs
YUYDOL
TUTBUF01	No	No	Yes	No	No	Zwitterionic Polymorphic Pairs
TUTBUF
DHNAPH17	No	No	Yes	No	No	Tautomeric Polymorphic Pairs
DHNAPH06
DHNAPH05
IYAQOP02	No	No	Yes	No	No	Tautomeric Polymorphic Pairs
BARBAC02
BARBAC01
BARBAC03
THBARB02	No	No	Yes	No	No	Tautomeric Polymorphic Pairs
THBARB03
THBARB01
PABNAJ
PABNIR
HUMLUW01	No	No	Yes	No	No	Tautomeric Polymorphic Pairs
HUMLUW
UHENIE
OGUWES	No	No	Yes	No	No	Zwitterionic Polymorphic Pairs
RAHHIU
LEPZUC	No	No	Yes	No	No	Tautomeric Polymorphic Pairs
LEMMOG
TERPOY	No	No	Yes	No	No	Tautomeric Polymorphic Pairs
TERPUE
KUXPUP	No	No	Yes	No	No	Zwitterionic Polymorphic Pairs
KUXPUP01
AKIHAF
MIZTOG	No	Yes	Yes	No	No	Charge in different location
MIZTUM
LUQLOY	No	No	Yes	No	No	Tautomeric Polymorphic Pairs
EVEXAE
PIMBAP	No	No	Yes	No	No	Zwitterionic Polymorphic Pairs
PIMBAP04
PIMBAP07
PIMBAP08
TODBEW	Yes	No	Yes	No	No	Salt/Co-Crystal Pairs
YIVHAO
UCEBOW	No	No	Yes	No	No	Tautomeric Polymorphic Pairs
UCEBIQ
